# Supplementary material for: Rooted tRNAomes and evolution of the genetic code
Source: PubMed Central journal article supplement — Transcription. 2018 Feb 6;9(3):137–51. doi: 10.1080/21541264.2018.1429837 (PMC5927645; doi:10.1080/21541264.2018.1429837), 2018-02-06
Supplement: ktrn-09-03-1429837-s001.pdf [file ktrn-09-03-1429837-s001.pdf]

Supplementary Materials

# Rooted tRNAomes and Evolution of the Genetic Code

Daewoo Pak<sup>1</sup>, Nan Du<sup>2</sup>, Yunsoo Kim<sup>3</sup>, Yanni Sun<sup>2</sup>, and Zachary F. Burton<sup>4\*</sup>

1. Center for Statistical Training and Consulting, Michigan State University, E. Lansing, MI 48824, USA
2. Computer Science and Engineering, Michigan State University, E. Lansing, MI 48824
3. Troy High School, Troy, MI
4. Department of Biochemistry and Molecular Biology, Michigan State University, E. Lansing, MI 48824-1319

\* Corresponding author: Department of Biochemistry and Molecular Biology, Michigan State University, E. Lansing, MI 48824-1319, Phone: 517-353-0859, Fax: 517-353-9334, [burton@msu.edu](mailto:burton@msu.edu)

## Supplemental Figures

Figure S1. An evolutionary tree of the *Pyrococcus furiosus* DSM3638 (archaea) DNA tRNA<sup>ome</sup>. Trees are rooted to tRNA<sup>Pri</sup>. An error was corrected in tRNA<sup>Arg</sup> (anticodon GCG), in which the 5'- and 3'-acceptor stems did not fully pair.

Figure S2. An evolutionary tree of the *Pyrococcus abyssi* GE5 (archaea) tRNA<sup>ome</sup>.

Figure S3. An evolutionary tree of the *Pyrococcus horikoshii* OT3 (archaea) tRNA<sup>ome</sup>.

Figure S4. An evolutionary tree of the *Staphylothermus marinus* F1 (archaea) tRNA<sup>ome</sup>.

Figure S5. An evolutionary tree of the *Pyrobaculum aerophilium* str. IM2 (archaea) tRNA<sup>ome</sup>.

Figure S6. An evolutionary tree of the *Sulfolobus solfataricus* P2 (archaea) tRNA<sup>ome</sup>.

Figure S7. An evolutionary tree of the *Aeropyrum pernix* K1 (archaea) tRNA<sup>ome</sup>.

Figure S8. An evolutionary tree of the *Thermus thermophilus* HB27 (bacteria) tRNA<sup>ome</sup>.

Figure S9. Typical tRNA diagrams for *Pyrococcus furiosus*, *Thermus thermophilus* and *Escherichia coli*.

Diagrams were generated using the tRNA database.<sup>1</sup>

Figure S10. Modifications of tRNAs in archaea. Modifications are shown for *Haloferax volcanii* (archaea). In the *Pyrococcus* typical DNA diagram: cyan dots) anticodon bases; orange dots) loop bases 6-7 (loop bases 3-7 are tightly stacked as in a helix, filling the 7-mer loop); yellow dots) intercalation of D loop G19 lifts T loop base 5 to the position of base 7 in the anticodon loop, flipping bases 6 and 7 out of the T loop. U turns are indicated (red arrows). The discriminator base is indicated (cyan arrow).

## References:

1. Juhling F, Morl M, Hartmann RK, Sprinzl M, Stadler PF, Putz J. tRNADB 2009: compilation of tRNA sequences and tRNA genes. *Nucleic Acids Res* 2009; 37:D159-62.

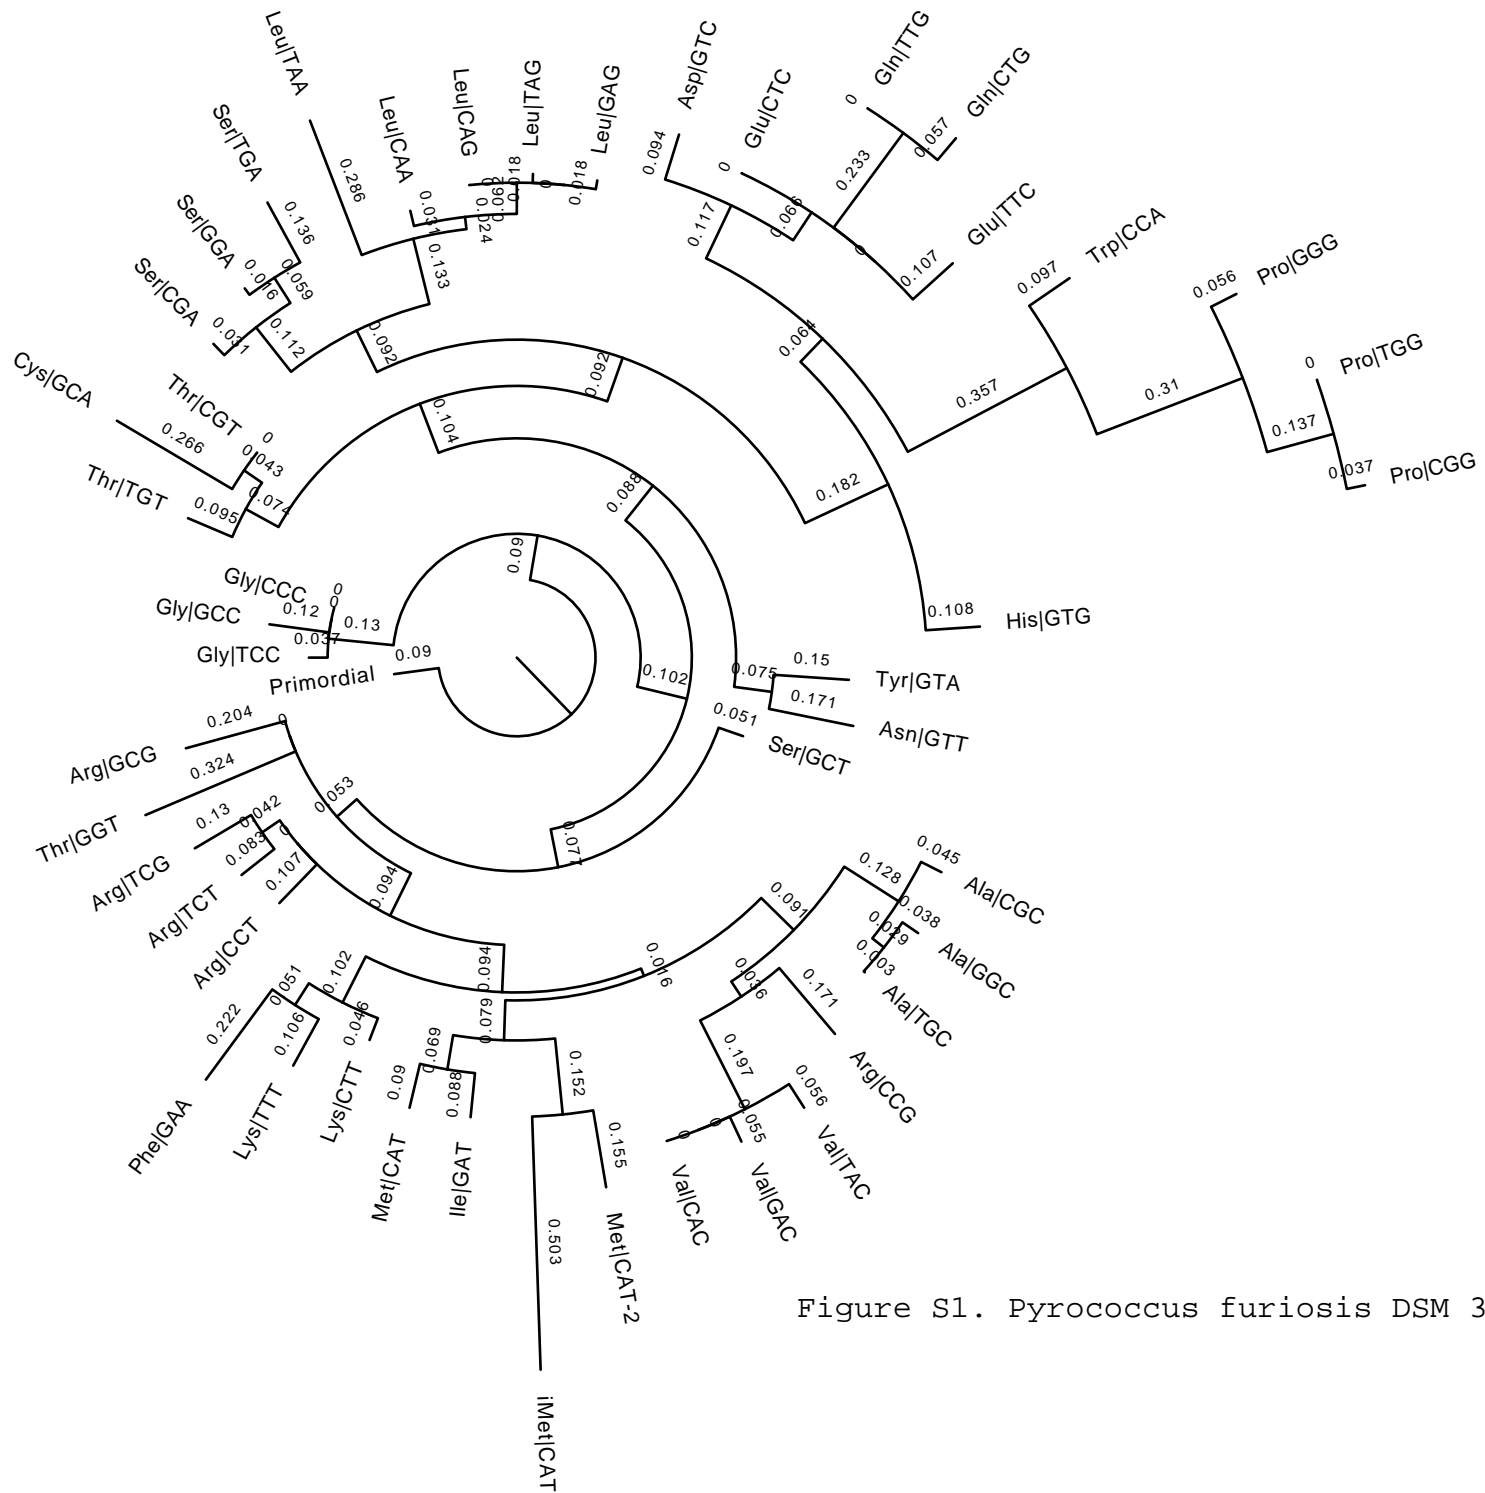

Figure S1. *Pyrococcus furiosus* DSM 3638.

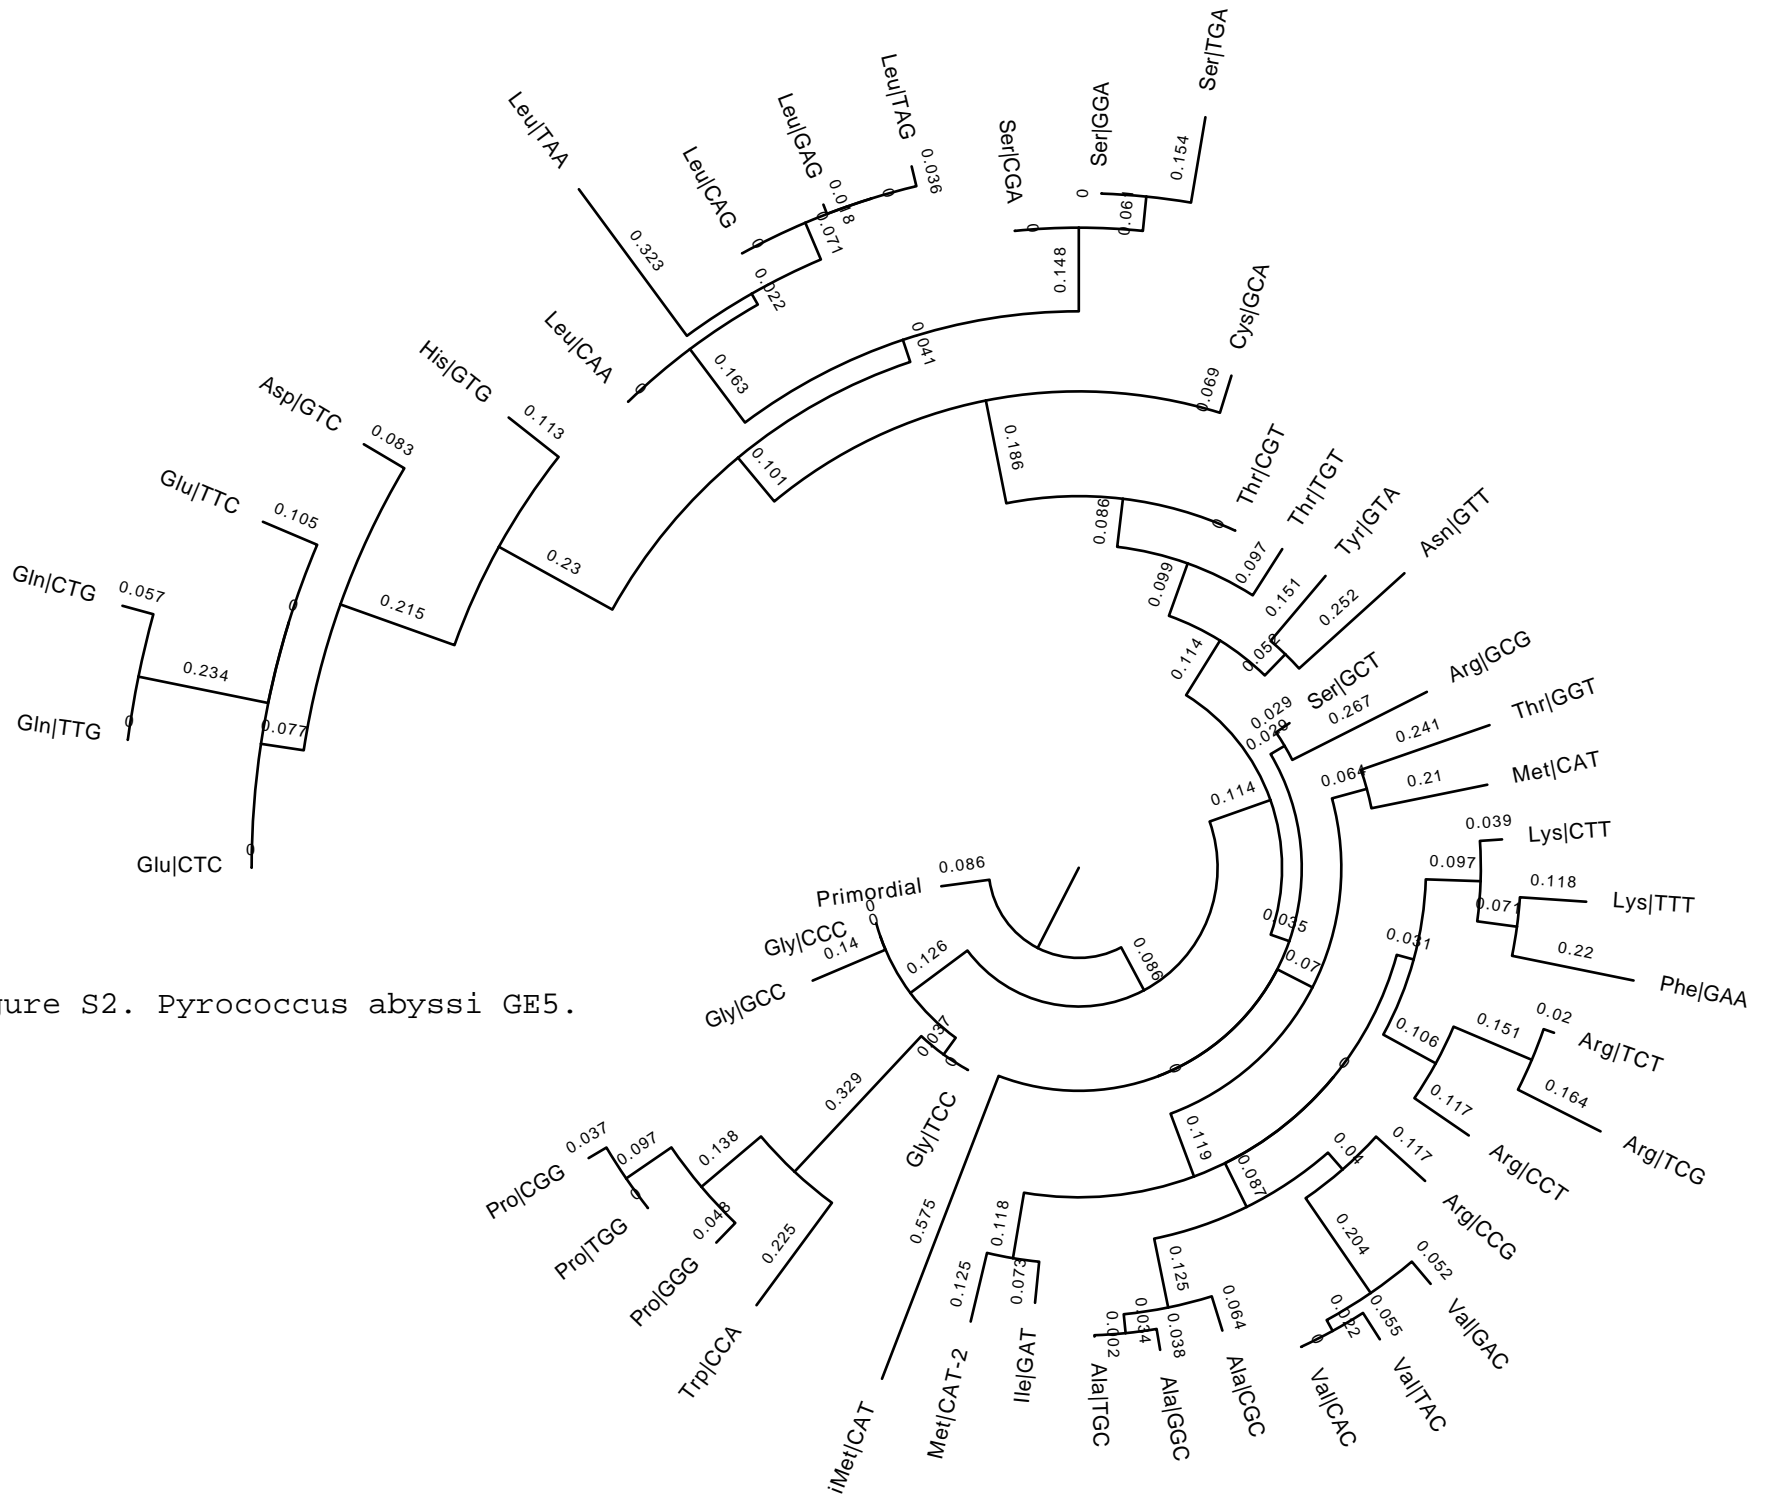

Figure S2. *Pyrococcus abyssi* GE5.

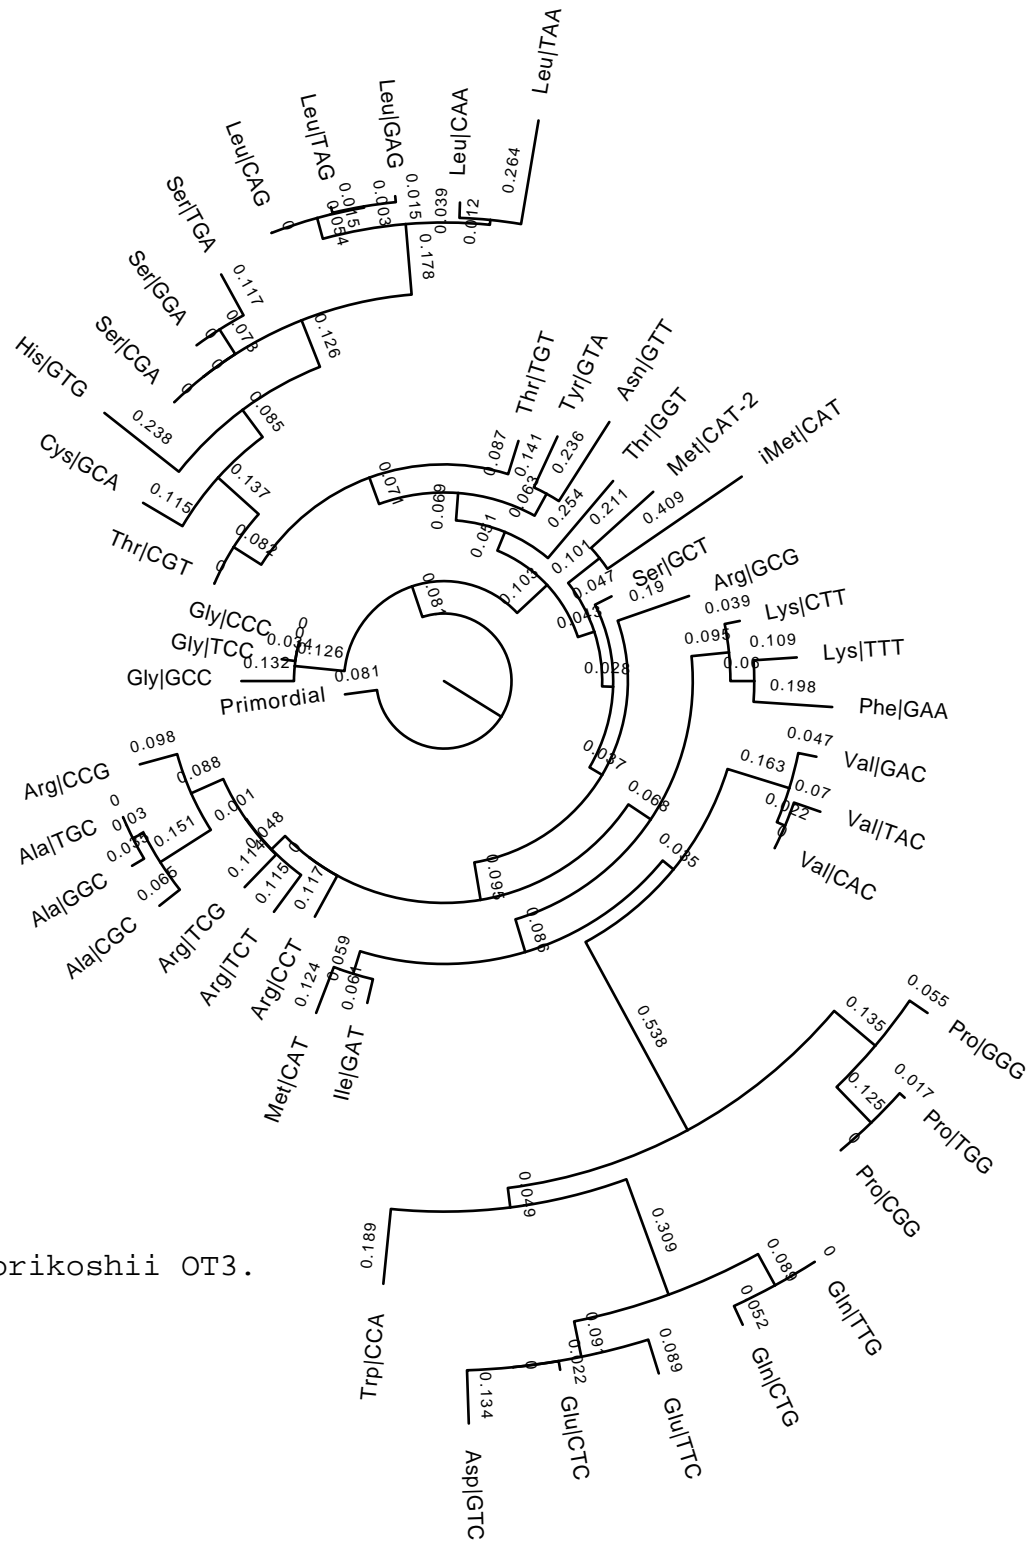

Figure S3. *Pyrococcus horikoshii* OT3.

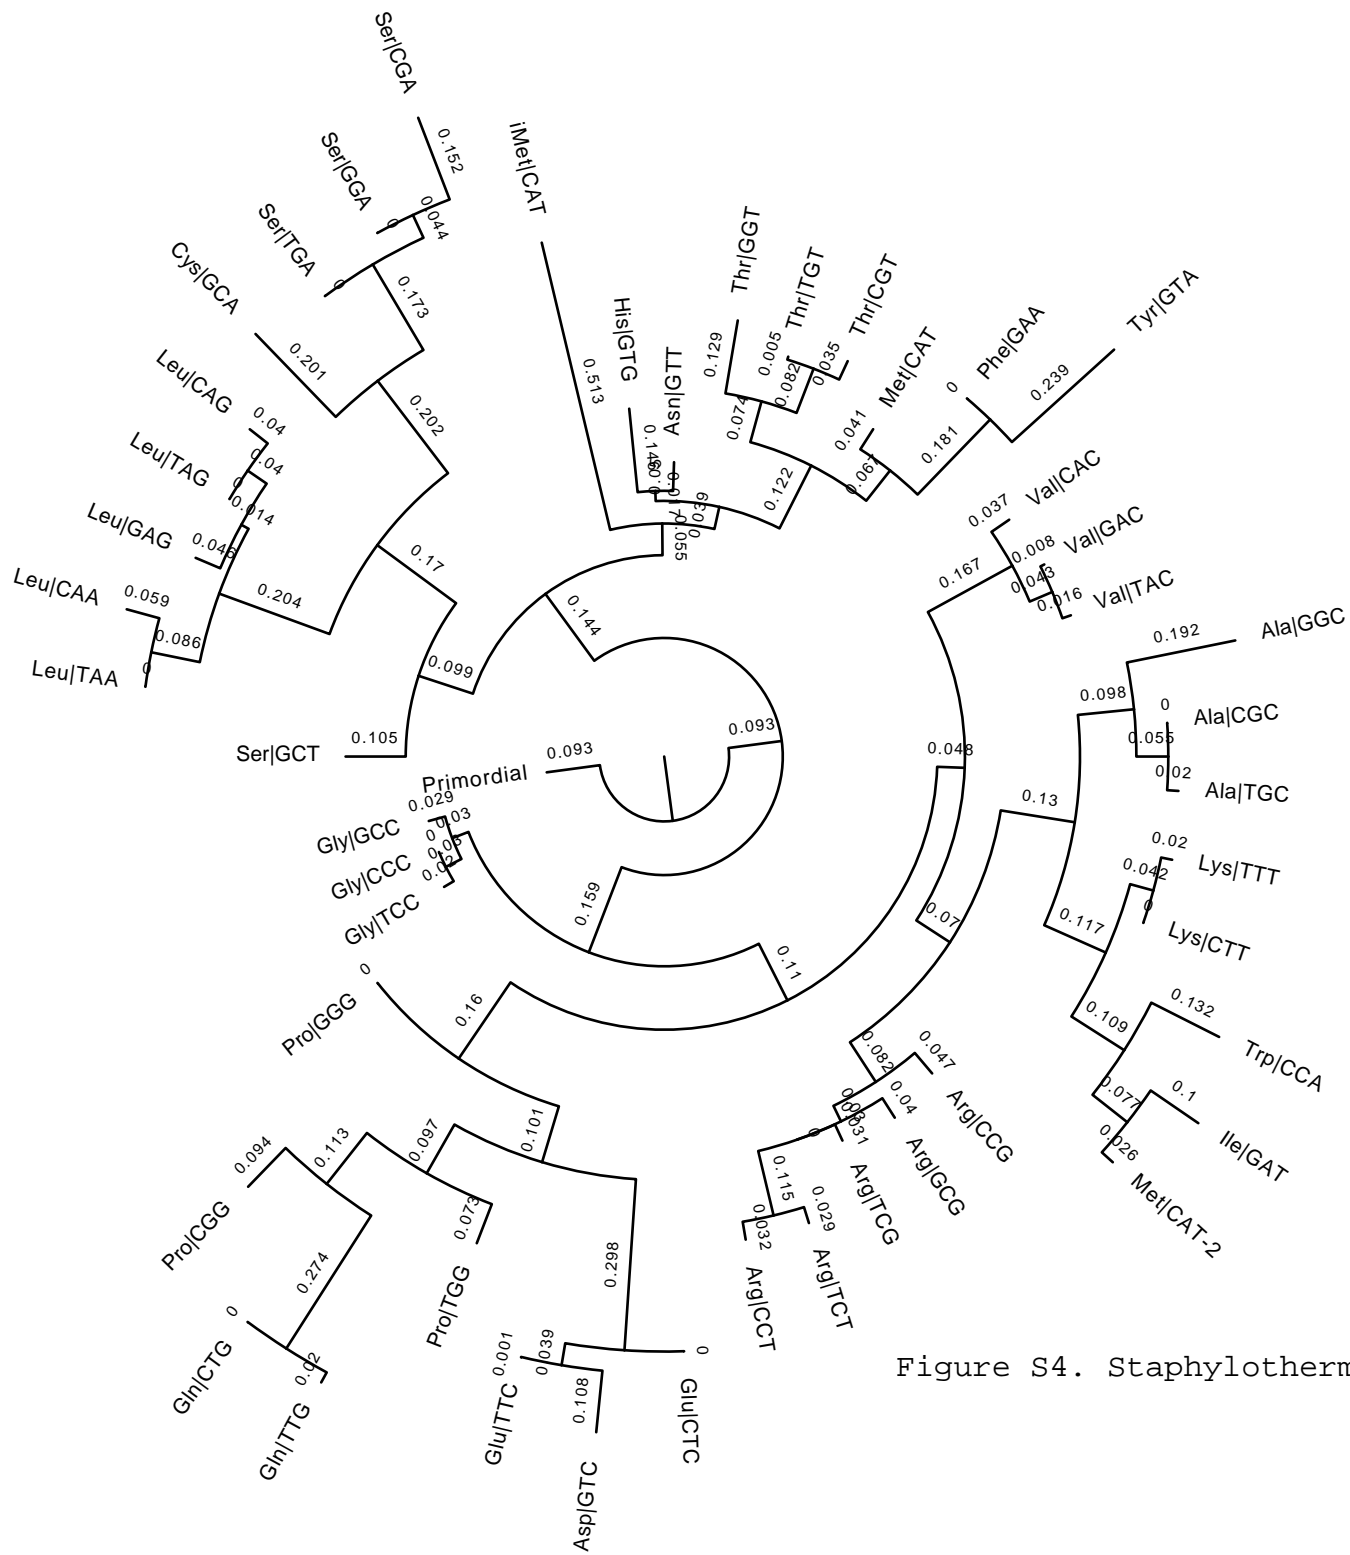

Figure S4. *Staphylothermus marinus* F1.

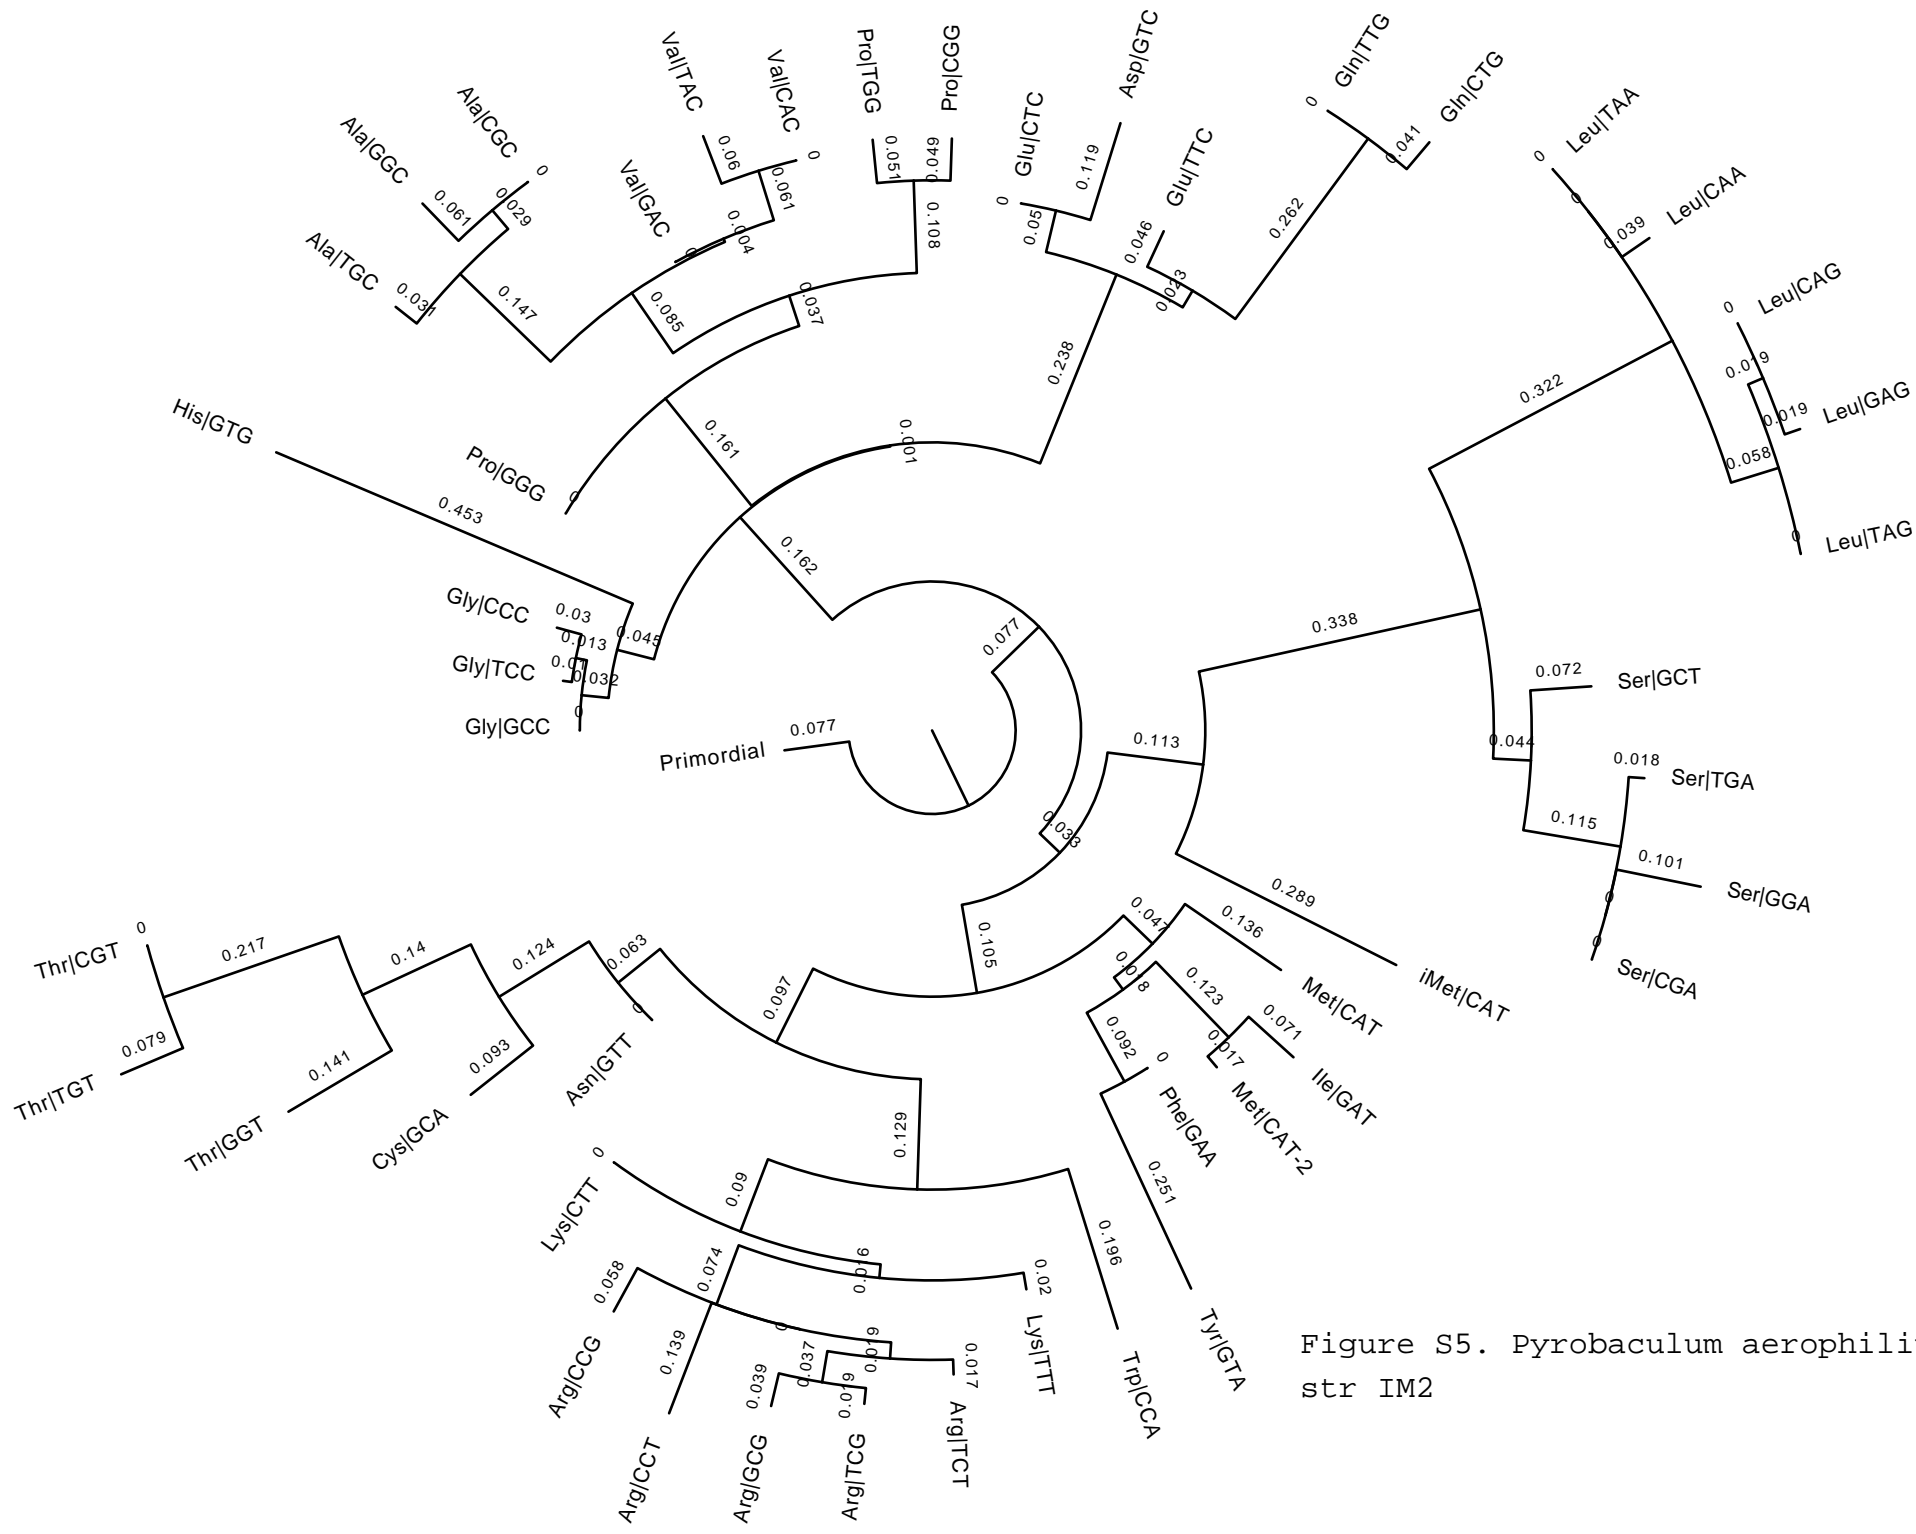

Figure S5. *Pyrobaculum aerophilum* str IM2

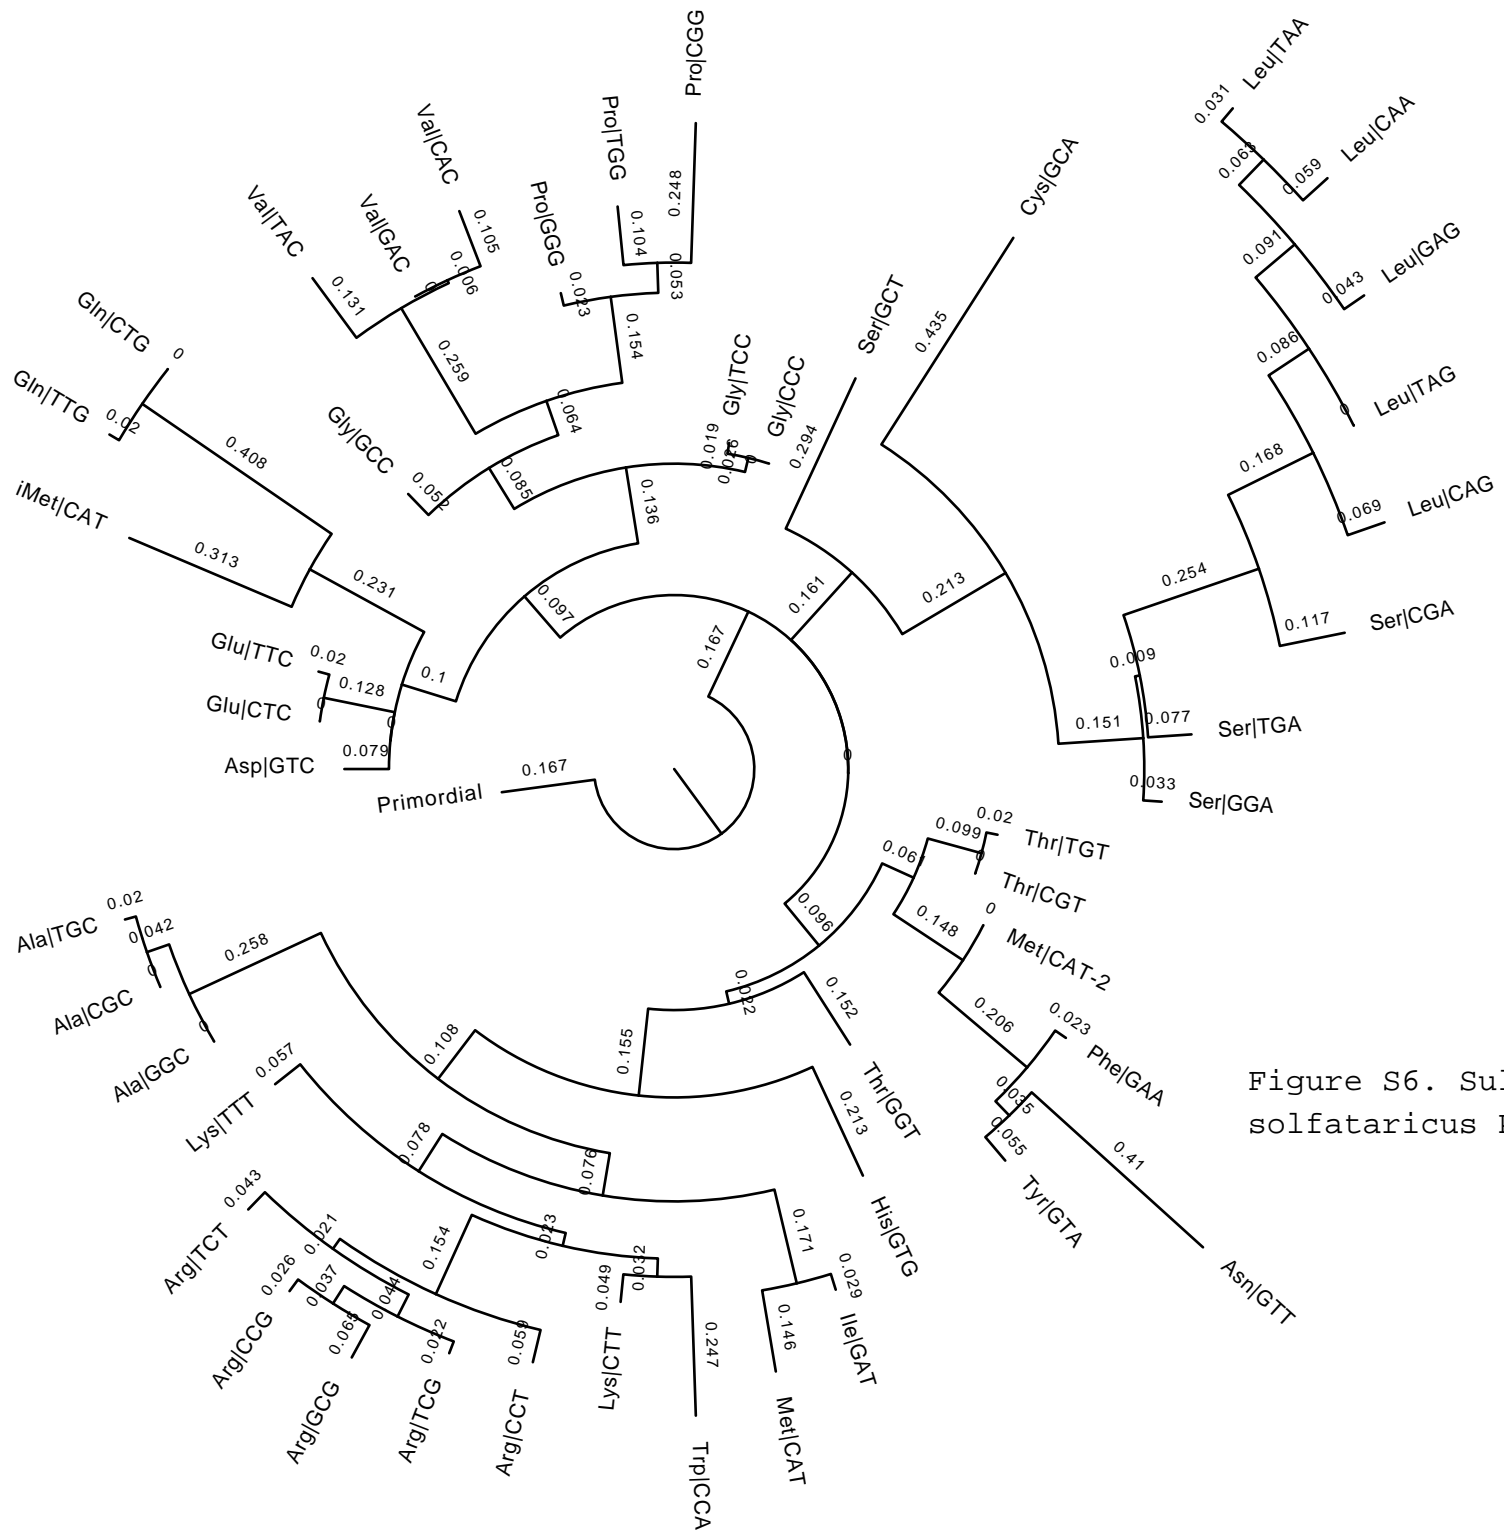

Figure S6. *Sulfolobus solfataricus* P2.



Figure S7. *Aeropyrum pernix* K1.

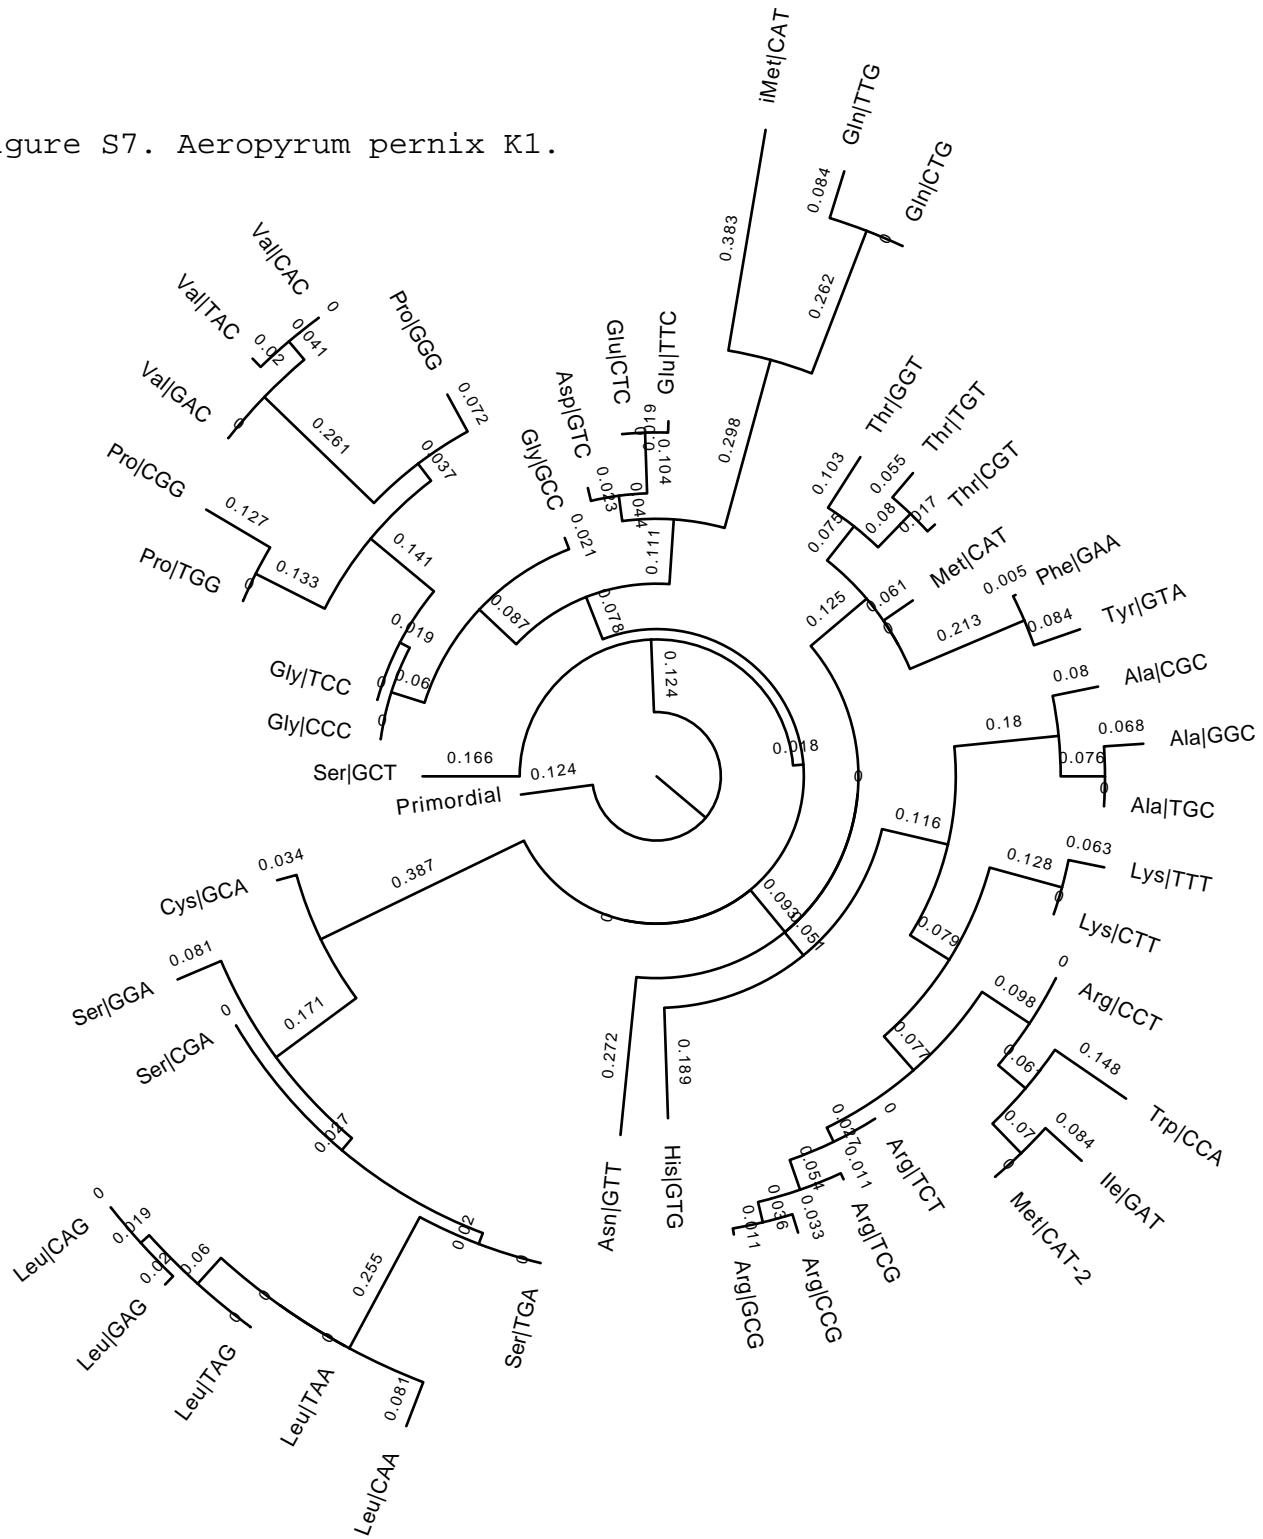



Figure S9. Typical tRNAs.

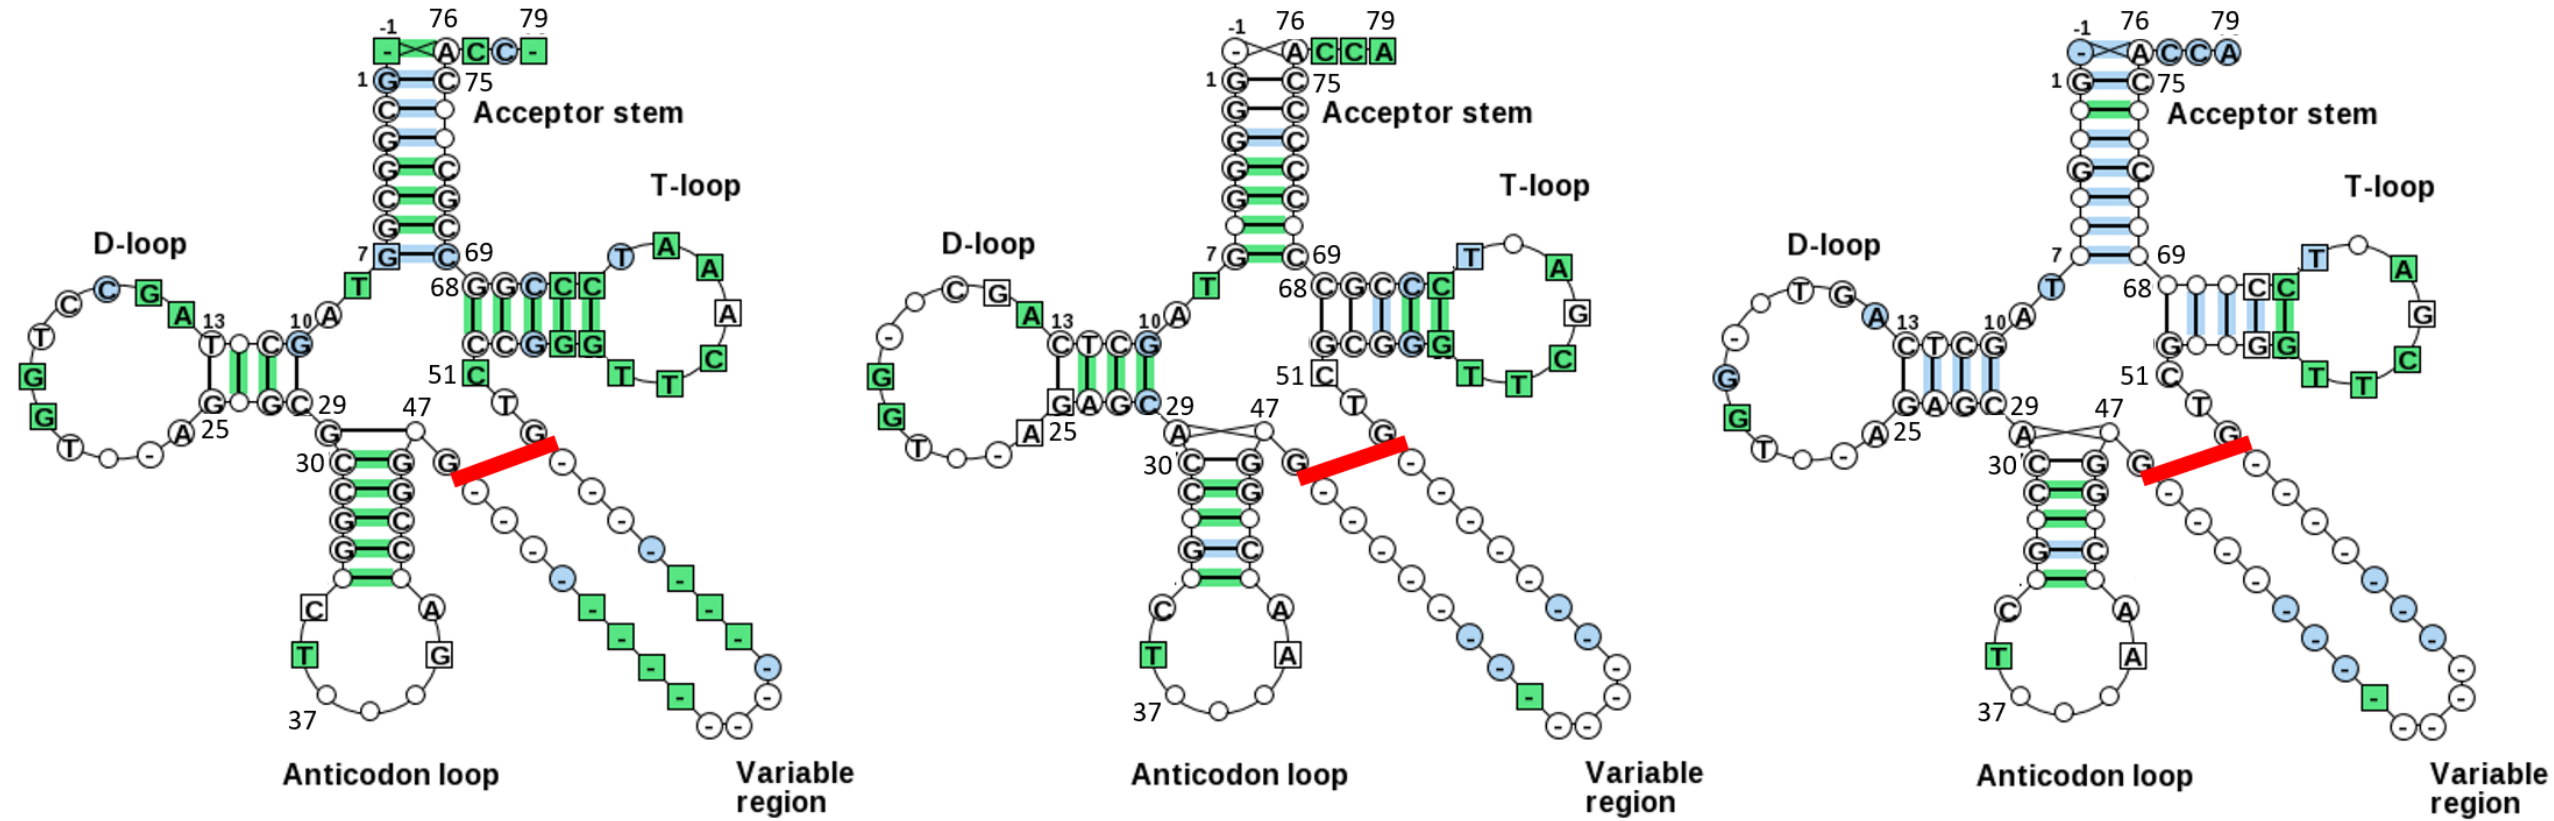

*Pyrococcus furiosus* DSM 3638

*Thermus thermophilus* HB27

*Escherichia coli* K12

Figure S10. tRNA modifications in archaea.

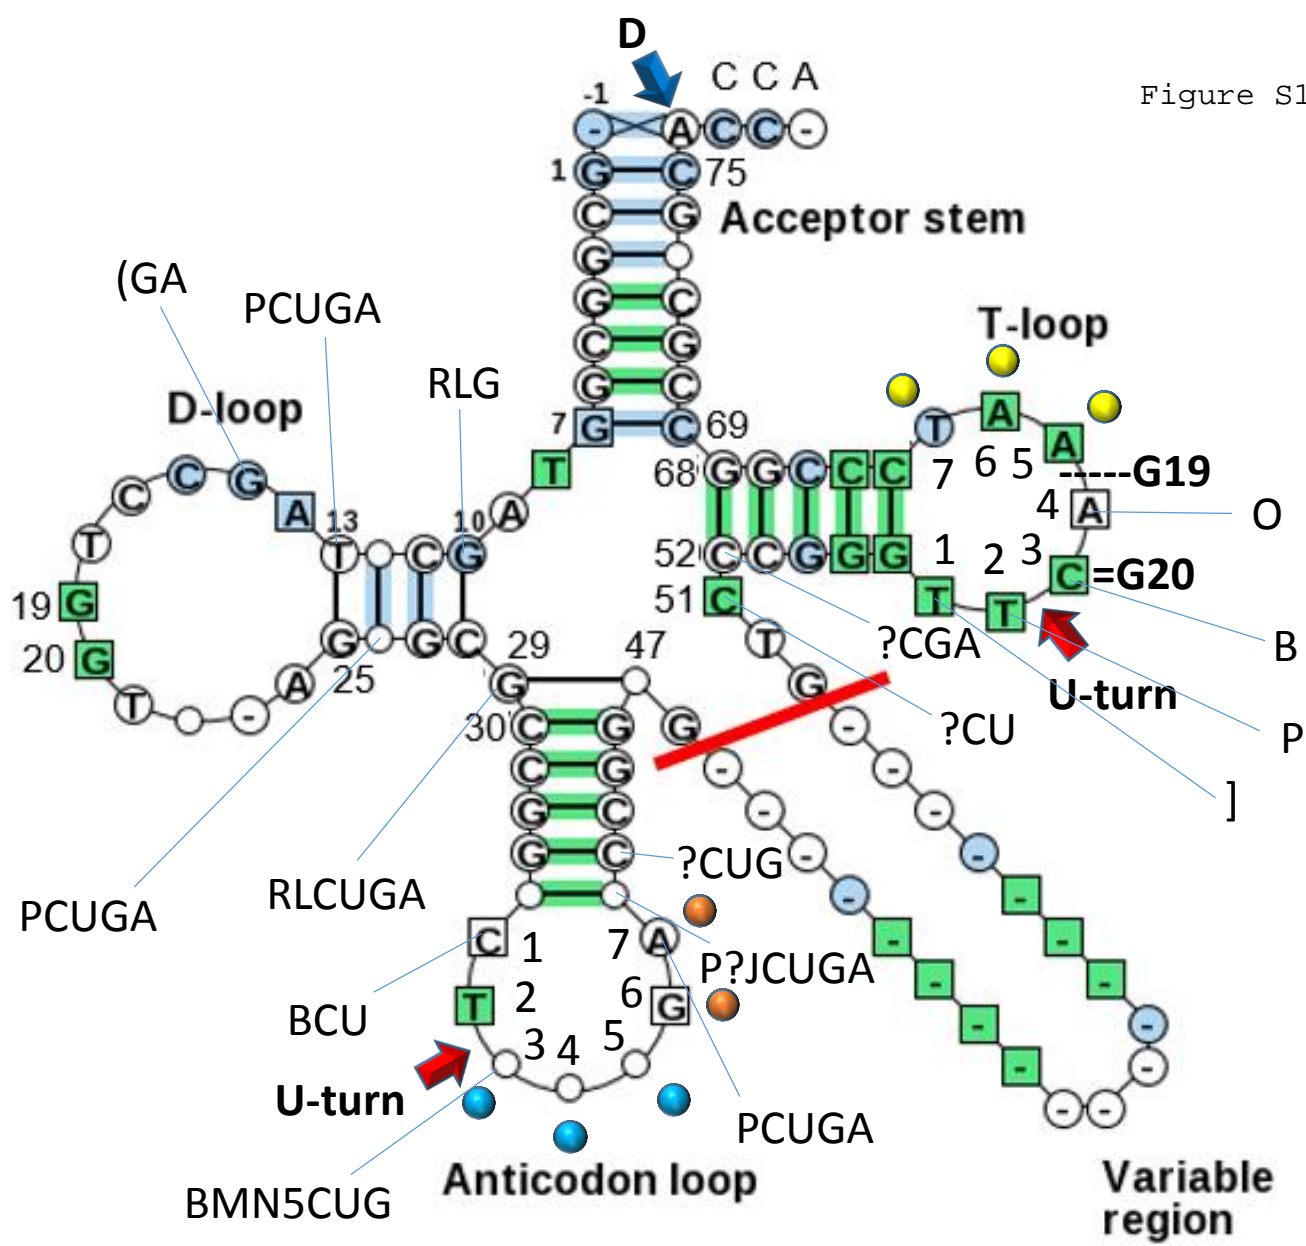

Key:

- R N2-N2-dimethylguanosine
- L N2-methylguanosine
- P pseudouridine
- ( archaeosine
- B 2'-O-methylcytidine
- M N4-acetylcytidine
- N unknown modified uridine
- 5 5-methoxyuridine
- ? 5-methylcytidine
- J 2'-O-methyluridine
- ] 1-methylpseudouridine
- O 1-methylinosine

Modifications from *Haloferax volcanii*
